# Supplementary material for: Meta-analysis of the effect of vitamin D on depression
Source: Front Psychiatry. 2025 Jul 31;16:1622796. doi: 10.3389/fpsyt.2025.1622796 (PMC12352333; doi:10.3389/fpsyt.2025.1622796)
Supplement: Supplementary Table 2 — Supplementary table information included in the literature. [file Table1.xlsx]

## Sheet: Sheet1
	Method	Metric	Estimate	SE	t / z	P-value
	Begg’s test	Kendall’s z	–1.56	–	z = –1.56	0.12
	Egger’s test	Intercept (bias)	–2.4301	0.466	t = –5.21	< 0.001
		Slope	0.0547	0.0289	t = 1.89	0.075
	Trim-and-Fill	Number of imputed studies	0	–	–	–
		Adjusted pooled SMD	–0.44	–	z = –4.92	< 0.0001
		95% CI	[–0.62, –0.27]	–	–	–
